# Supplementary material
Source: PubMed Central journal article supplement (PMC3032585)

A

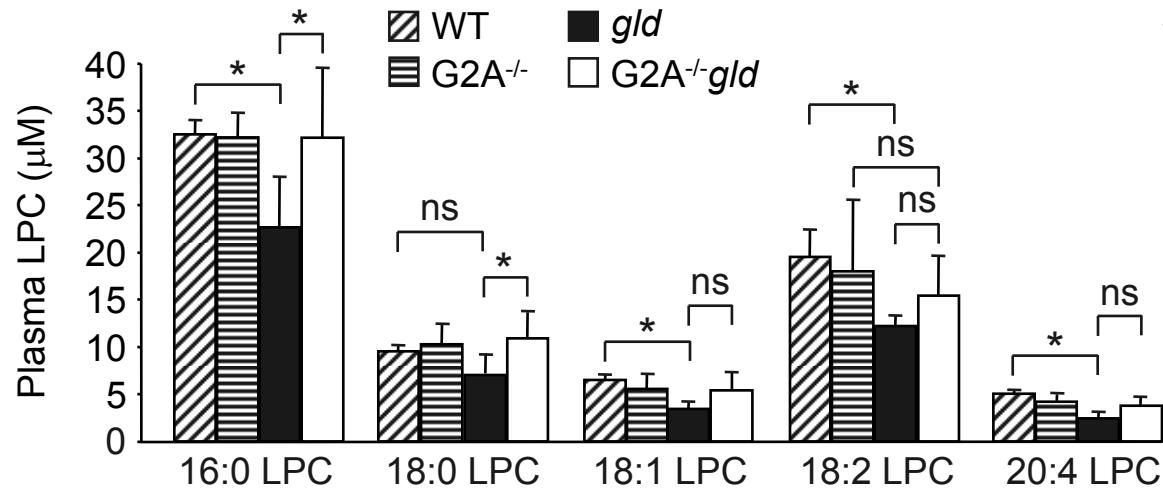

B

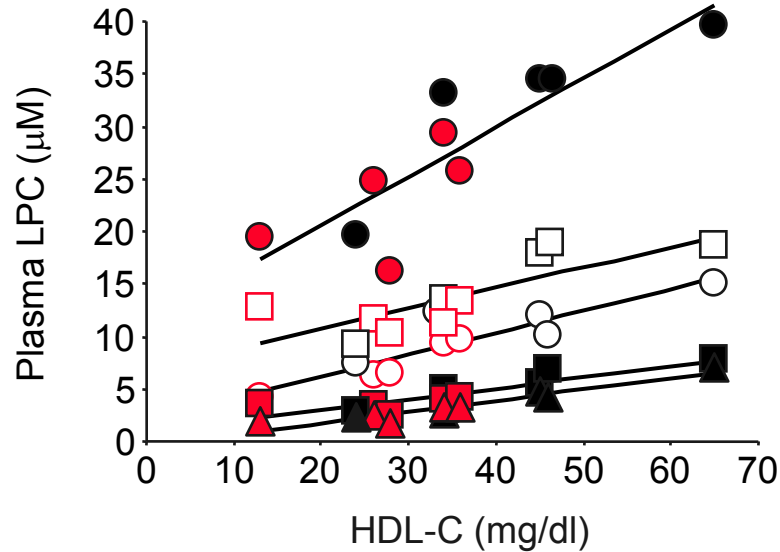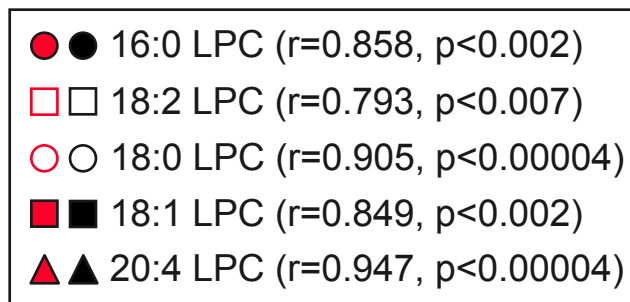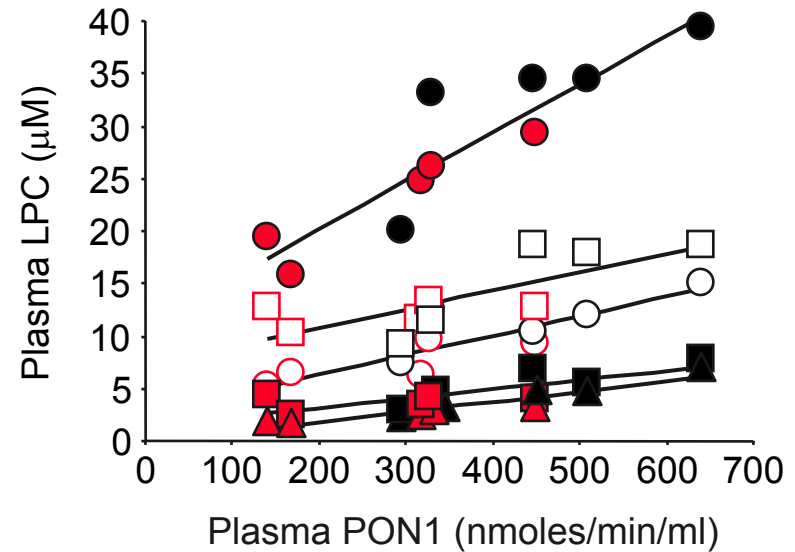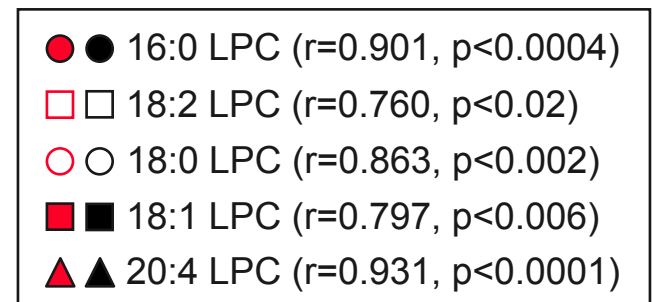

Supplement: NIHMS239047-supplement-Supp_Fig_1.pdf [file NIHMS239047-supplement-Supp_Fig_1.pdf]
